# Supplementary material for: PMMA-Etching-Free Transfer of Wafer-scale Chemical Vapor Deposition Two-dimensional Atomic Crystal by a Water Soluble Polyvinyl Alcohol Polymer Method
Source: PubMed Central journal article supplement (PMC5018882; doi:10.1038/srep33096), 2016-09-12
Supplement: srep33096-s1.pdf [file srep33096-s1.pdf]

# Supplementary Information

## PMMA-Etching-Free Transfer of Wafer-scale Chemical Vapor Deposition Two-dimensional Atomic Crystal by a Water Soluble Polyvinyl Alcohol Polymer Method

Huynh Van Ngoc<sup>1</sup>, Yongteng Qian<sup>1</sup>, Suk Kil Han<sup>2</sup> and Dae Joon Kang<sup>1,\*</sup>

<sup>1</sup>Department of Physics and Interdisciplinary Course of Physics and Chemistry, Sungkyunkwan University, 2066, Seobu-Ro, Jangan-Gu, Suwon, Gyeonggi-do 16419, Republic of Korea

<sup>2</sup>Teraleader Inc., 55-8, Techno-11ro, Yuseong-gu, Daejeon 34036, Republic of Korea

### 1. Electrochemical bubbling method for transfer of h-BN.

The front side of the h-BN film on the Pt foil was covered with PMMA. The Pt foil was immersed in an aqueous solution of 1 M NaOH for electrochemical delamination. The PMMA/PAV/h-BN/Pt foil and a bare Pt foil were employed as cathode and anode, respectively. The bubbling transfer was performed under a constant current of 1 A (corresponding electrolytic voltage of 5 - 12 V) for 1 - 5 min. After peeling the PMMA/PAV/h-BN film off from the Pt foil, it was rinsed with deionized water three times to remove residual NaOH. Finally, it was transferred onto a SiO<sub>2</sub>(100 nm)/Si substrate.

---

\* Corresponding author: dj kang@skku.edu

## 2. AFM images of transferred graphene after annealing

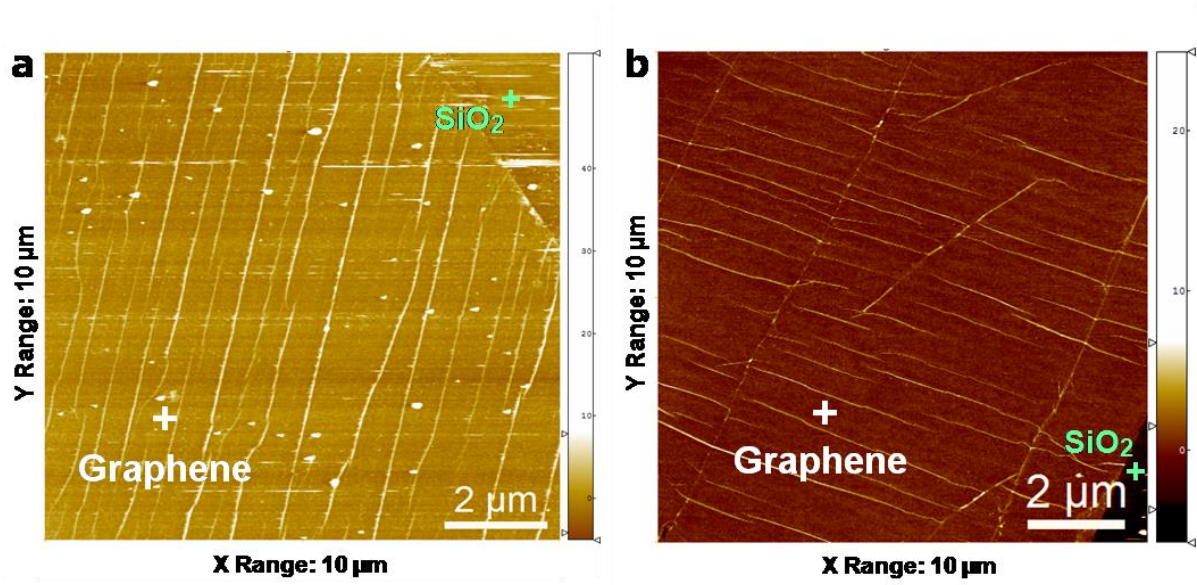

**Figure S1.** AFM images of graphene on SiO<sub>2</sub>/Si substrate transferred using PMMA and PMMA/PVA, respectively, after annealing.

### 3. Optical and Raman spectra of transferred graphene after annealing

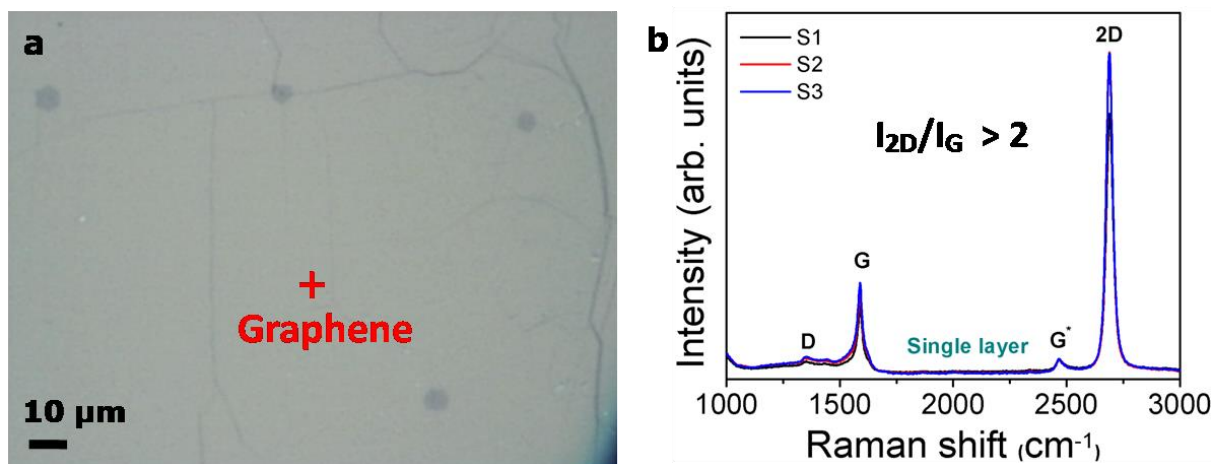

**Figure S2.** Transferred graphene on SiO<sub>2</sub>/Si substrate after annealing using the PMMA/PVA transferring method: (a) Optical microscope image and (b) Raman spectrum

4. Optical images and Raman spectroscopy of single layer h-BN transferred using the PMMA and PMMA/PVA methods

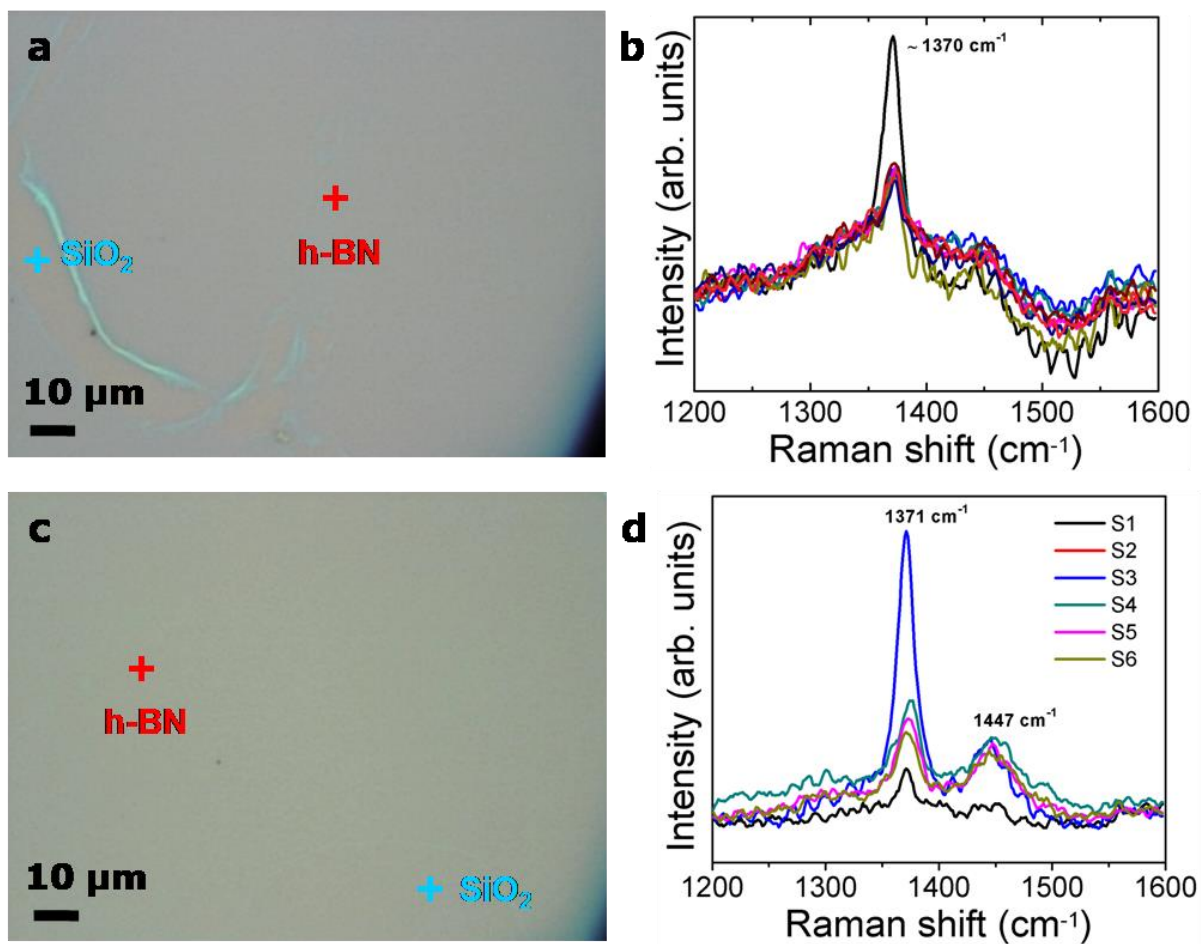

**Figure S3.** Transferred h-BN on SiO<sub>2</sub>/Si substrate: (a, c) Optical microscope image and (b, d) Raman spectroscopy for the PMMA and PMMA/PVA methods of transfer, respectively.

## 5. Transferring MoS<sub>2</sub> to target substrates

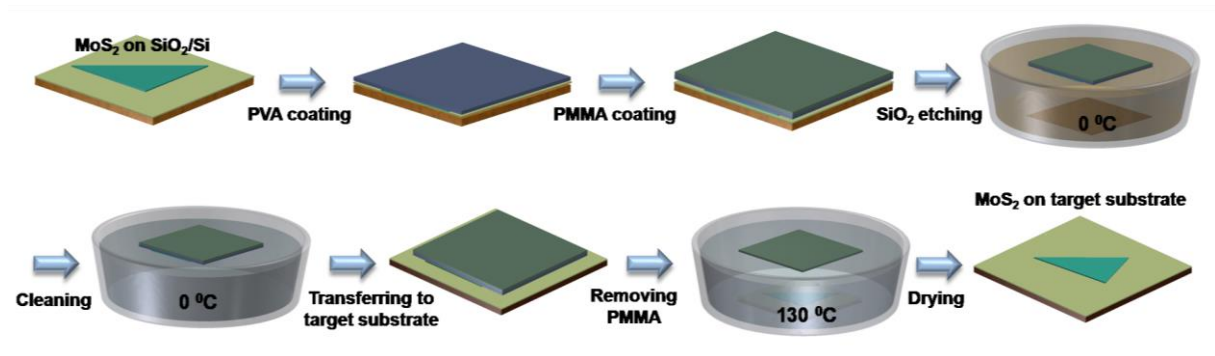

**Figure S4.** Schematic illustration of PMMA/PVA assisted transfer of CVD-grown MoS<sub>2</sub> onto a SiO<sub>2</sub>/Si substrate by oxide layer etching method.

## 6. Electrical transport properties of single layer MoS<sub>2</sub> FET devices

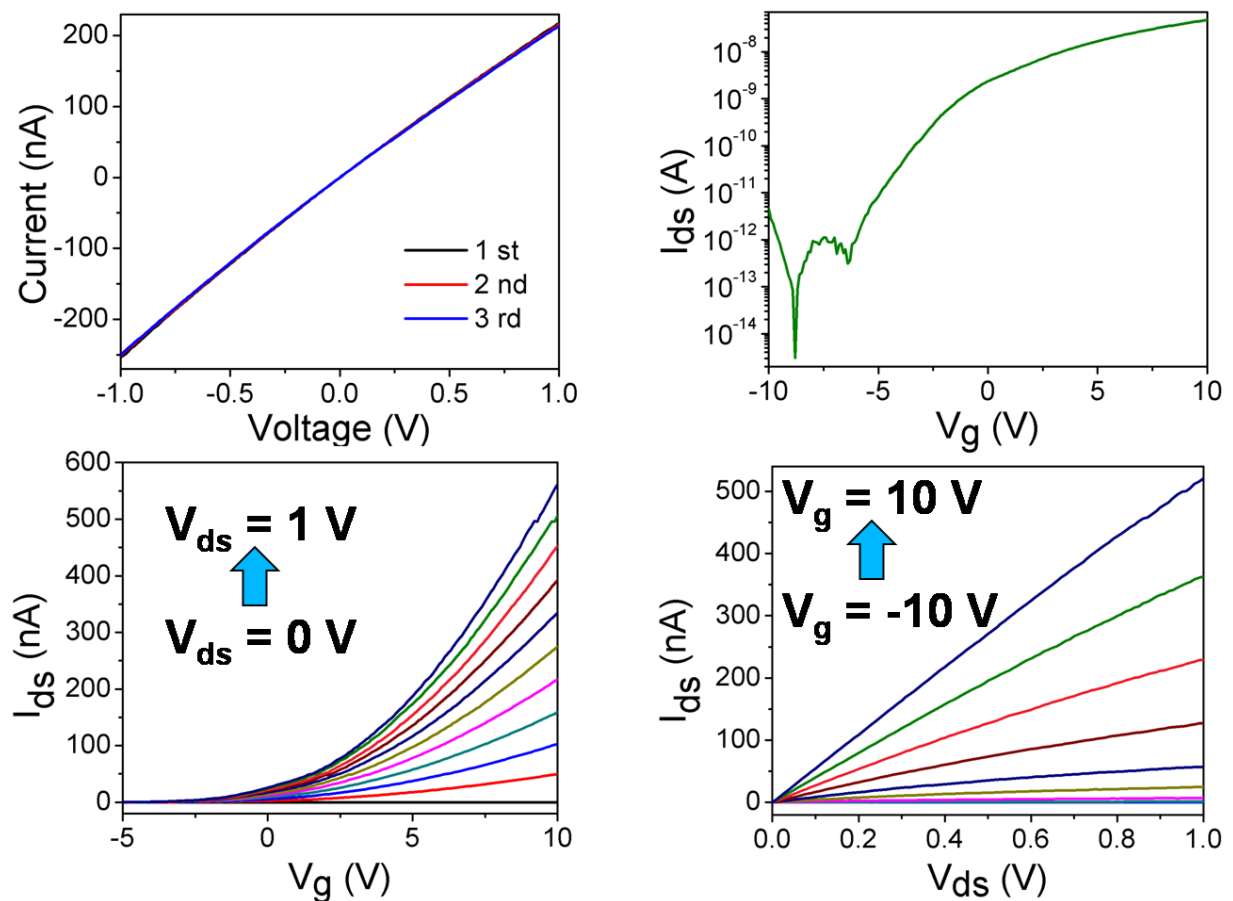

**Figure S5.** Electrical transport properties at ambient conditions of single layer MoS<sub>2</sub> FET devices based on PMMA/PVA transfer method. (a) Two probe measurements, (b) and (c)  $I_{ds}$ - $V_g$  transfer characteristics and (d)  $I_{ds}$ - $V_{ds}$  output characteristics.

To investigate the electrical properties of single layer MoS<sub>2</sub>, we prepared typical MoS<sub>2</sub> FETs on a 100 nm thick SiO<sub>2</sub> layer on a heavily boron doped Si (p++ Si) substrate. The a-Si served as the back gate electrode. Figure S5d shows the drain current versus drain-source voltage ( $I_{ds}$ - $V_{ds}$ ) curves for a single layer MoS<sub>2</sub> FET. The conductance of MoS<sub>2</sub> increases monotonically as the gate potential increases from -10 V to +10 V, exhibiting a typical n-type MoS<sub>2</sub> FET behaviour. Figure S5c shows the drain current versus gate-source voltage ( $I_{ds}$ - $V_g$ ) curves obtained by sweeping the gate voltage continuously from -5 V to 10 V at drain voltages ranging from 0 to 1 V. The transconductance ( $g_m$ ) and field effect electron mobility ( $\mu_e$ ) of the back gate MoS<sub>2</sub> FETs were determined from the  $I_{ds}$ - $V_g$  curves using the following equations:  $g_m = dI_{ds}/dV_g$  and  $\mu_e = g_m(L/W)(1/V_{ds}C_{ox})$ . The gate oxide capacitance ( $C_{ox}$ ) of a cylindrical wire on a planar substrate can be estimated by the relation  $C_{ox} = \epsilon_r\epsilon_0LW/t_{ox}$  using a relative dielectric constant value ( $\epsilon_r$ ) of 3.9, a SiO<sub>2</sub> gate dielectric layer thickness ( $t_{ox}$ ) of 100 nm, a MoS<sub>2</sub> conducting channel length ( $L$ ) of approximately 10  $\mu$ m, and a width of approximately 20  $\mu$ m. For n-type MoS<sub>2</sub> FETs on a SiO<sub>2</sub>/Si substrate, a threshold voltage ( $V_{th}$ ) of -6.5 V and a transconductance ( $g_m$ ) of 83 nS were extrapolated from the linear region of the  $I_{ds}$ - $V_g$  curve at a value of 0.1 V for the  $V_{Ds}$ . The values of the field-effect electron mobility ( $\mu_e$ ) and the resistivity ( $\rho$ ) for MoS<sub>2</sub> were calculated from two-probe measurements and found to be 12 cm<sup>2</sup> V<sup>-1</sup> s<sup>-1</sup> and 0.21  $\Omega$  cm, respectively (Fig. S5a). Electron carrier concentration ( $n_e$ ) was calculated to be  $2.58 \times 10^{17}$  e/cm<sup>3</sup> using the equation,  $n_e = C_{ox}V_{th}/e\pi r^2L$ . The sub-threshold swing given by  $S.S = \log [dV_g/d(\log I_{ds})]$  was estimated to be 22 mV dec<sup>-1</sup>.
